# Supplementary material for: Long-Term Health-Related Quality of Life following Acute Type A Aortic Dissection with a Focus on Male–Female Differences: A Cross Sectional Study
Source: MDPI journal article supplement (doi:10.3390/jcm13082265), 2024-04-13
Supplement: s1 [file s1]

## Appendix SI. Variable definitions patient characteristics

|                                                   | Unit           | Definition                                                                                        |
|---------------------------------------------------|----------------|---------------------------------------------------------------------------------------------------|
| <i>Patient demographics at ATAAD presentation</i> |                |                                                                                                   |
| <b>Age at ATAAD</b>                               | years          | Age at ATAAD presentation                                                                         |
| <b>BSA</b>                                        | m <sup>2</sup> | $\sqrt{\frac{\text{height (cm)} \times \text{weight (kg)}}{3600}}$                                |
| <b>History of hypertension</b>                    |                | Known hypertension in patient history or medical treatment for hypertension.                      |
| <b>History of hyperlipidemia</b>                  |                | Medical treatment for hyperlipidemia or in patient history.                                       |
| <b>Diabetes mellitus</b>                          |                | Known diabetes mellitus in patient history or medical treatment for diabetes mellitus.            |
| <b>COPD</b>                                       |                | Any history of Chronic Obstructive Pulmonary Disease that required medical treatment or FEV1<70%. |
| <b>Current or past smoking ≥ 1 pack years</b>     |                | Currently smoking or > 1 pack year in past.                                                       |
| <b>History of CVA or TIA</b>                      |                | History of CVA or TIA                                                                             |
| <b>History of MI</b>                              |                | (N)STEMI > 90 days before presentation                                                            |
| <b>Chronic kidney disease</b>                     |                | History of chronic kidney disease                                                                 |
| <b>Prior TAA</b>                                  |                | Thoracic aortic diameter of ≥ 40 mm.                                                              |
| <b>Prior aortic surgery</b>                       |                | Prior aortic surgery reported in patient history                                                  |
| <b>Prior cardiac surgery</b>                      |                | Prior cardiac surgery reported in patient history                                                 |
| <b>Bicuspid aortic valve</b>                      |                | Presence of bicuspid aortic valve, known in patient history or seen in the operation theatre      |

---

**Known connective tissue disease**

---

Known connective tissue disease at ATAAD  
presentation

---

ATAAD = acute type A aortic dissection; BSA = body surface area; COPD = chronic obstructive pulmonary disease; CVA = cerebrovascular accident; MI = myocardial infarction; TAA = thoracic aortic aneurysm; DHCA = deep hypothermic circulatory arrest

**Appendix SII Scores of the study population compared with the general Dutch population stratified by sex**

|                      | All patients<br>(n=324) | General<br>population | P-value | Female<br>(n=110) | General<br>female<br>population | P-value | Male<br>(n=214) | General male<br>population | P-value |
|----------------------|-------------------------|-----------------------|---------|-------------------|---------------------------------|---------|-----------------|----------------------------|---------|
| Physical Functioning | 66.9 ± 25.6             | 83.0 ± 22.8           | <0.001  | 59.7 ± 26.2       | 80.4 ± 24.2                     | <0.001  | 70.6 ± 24.6     | 85.4 ± 21.0                | <0.001  |
| Role Physical        | 58.9 ± 41.7             | 76.4 ± 36.3           | <0.001  | 50.5 ± 43.7       | 73.8 ± 38.5                     | <0.001  | 63.1 ± 40.1     | 78.7 ± 34.1                | <0.001  |
| Bodily pain          | 79.2 ± 24.4             | 74.9 ± 23.4           | 0.002   | 76.8 ± 24.6       | 71.9 ± 23.8                     | 0.039   | 80.5 ± 24.2     | 77.3 ± 22.7                | 0.056   |
| General Health       | 56.2 ± 22.7             | 70.7 ± 20.7           | <0.001  | 54.0 ± 22.6       | 69.9 ± 20.6                     | <0.001  | 57.4 ± 22.8     | 71.6 ± 20.6                | <0.001  |
| Vitality             | 60.1 ± 24.0             | 68.6 ± 19.3           | <0.001  | 56.2 ± 24.3       | 64.3 ± 19.7                     | <0.001  | 62.1 ± 23.6     | 71.9 ± 18.3                | <0.001  |
| Social Functioning   | 78.6 ± 26.3             | 84.0 ± 22.4           | <0.001  | 74.3 ± 28.3       | 82.0 ± 23.5                     | 0.006   | 80.8 ± 25.0     | 86.0 ± 21.1                | 0.003   |
| Role Emotional       | 76.7 ± 36.3             | 82.3 ± 32.9           | 0.007   | 72.3 ± 39.0       | 78.5 ± 35.7                     | 0.102   | 79.0 ± 34.7     | 85.5 ± 29.9                | 0.008   |
| Mental Health        | 77.4 ± 19.6             | 76.8 ± 17.4           | 0.573   | 72.3 ± 23.2       | 73.7 ± 18.2                     | 0.539   | 80.0 ± 17.0     | 79.3 ± 16.4                | 0.537   |

SF-36 subdomain scores are presented as mean ± SD in order to compare the data with the general population data which was reported as mean ± SD.

SD = standard deviation

**Appendix SIII Scores of the study population compared with the general Dutch population stratified by age category**

|                      | Age 41-60            |                    |         | Age 61-70             |                    |         | Age > 70              |                    |         |
|----------------------|----------------------|--------------------|---------|-----------------------|--------------------|---------|-----------------------|--------------------|---------|
|                      | TAAD patients (n=73) | General population | P-value | TAAD patients (n=119) | General population | P-value | TAAD patients (n=128) | General population | P-value |
| Physical Functioning | 71.3 ± 25.2          | 84.0 ± 19.6        | <0.001  | 70.3 ± 21.9           | 71.7 ± 25.6        | 0.505   | 61.7 ± 27.8           | 58.9 ± 30.8        | 0.254   |
| Role Physical        | 62.2 ± 39.1          | 74.5 ± 36.8        | 0.009   | 59.4 ± 43.2           | 67.3 ± 40.9        | 0.051   | 56.9 ± 41.6           | 56.9 ± 44.0        | 0.990   |
| Bodily pain          | 80.6 ± 22.1          | 71.8 ± 24.1        | 0.001   | 79.6 ± 25.9           | 70.5 ± 24.6        | <0.001  | 78.5 ± 24.0           | 68.1 ± 27.4        | <0.001  |
| General Health       | 53.7 ± 23.8          | 69.7 ± 20.6        | <0.001  | 57.2 ± 23.5           | 61.7 ± 20.2        | 0.038   | 57.1 ± 21.1           | 58.9 ± 21.1        | 0.339   |
| Vitality             | 57.3 ± 23.9          | 68.6 ± 20.2        | <0.001  | 60.6 ± 24.7           | 67.7 ± 19.6        | 0.002   | 61.7 ± 22.8           | 61.8 ± 23.6        | 0.973   |
| Social Functioning   | 77.4 ± 25.8          | 83.5 ± 22.1        | 0.047   | 79.2 ± 26.0           | 82.0 ± 24.6        | 0.251   | 78.9 ± 27.0           | 75.6 ± 27.0        | 0.177   |
| Role Emotional       | 77.5 ± 35.5          | 81.6 ± 33.2        | 0.330   | 78.2 ± 36.5           | 81.1 ± 35.0        | 0.388   | 75.3 ± 36.5           | 74.5 ± 38.2        | 0.815   |
| Mental Health        | 75.9 ± 18.2          | 75.6 ± 18.5        | 0.892   | 77.6 ± 19.9           | 76.9 ± 17.9        | 0.710   | 78.2 ± 20.3           | 73.0 ± 19.9        | 0.005   |

SF-36 subdomain scores are presented as mean ± SD in order to compare the data with the general population data which was reported as mean ± SD. P-values < 0.05 are depicted in bold. Three patients were in the age range of 16-40 year, therefore these patients were not included in the age-matched analysis.

SD = standard deviation

**Appendix SIV Multivariable linear regression analyses for the physical component summary (PCS) and mental component summary (MCS) scores adjusting for age and sex**

|                            | Physical component summary |         | Mental component summary |         |
|----------------------------|----------------------------|---------|--------------------------|---------|
|                            | Beta estimate (95% CI)*    | P-value | Beta estimate (95% CI)   | P-value |
| Follow-up time             | -0.093 (-0.443-0.257)      | 0.603   | 0.285 (-0.077-0.647)     | 0.123   |
| Age at ATAAD               | -                          | -       | -                        | -       |
| Sex (female)               | -                          | -       | -                        | -       |
| History of hypertension    | -3.428 (-5.715- -1.140)    | 0.003   | -2.307 (-4.710-0.096)    | 0.060   |
| History of hyperlipidaemia | -0.938 (-4.485-2.609)      | 0.603   | 1.768 (-1.901-5.438)     | 0.344   |
| Diabetes mellitus          | 2.872 (-8.596-14.340)      | 0.623   | 4.591 (-7.282-16.465)    | 0.447   |
| COPD                       | -7.282 (-12.852- -1.713)   | 0.012   | -2.701 (-8.514-3.112)    | 0.361   |
| History of CVA             | 2.522 (-3.364-8.308)       | 0.392   | -4.305 (-10.275-1.665)   | 0.157   |
| History of MI              | -4.841 (-12.348-2.666)     | 0.205   | 3.456 (-4.371-11.283)    | 0.386   |
| Chronic kidney disease     | 7.484 (-6.530-21.497)      | 0.294   | 10.169 (-4.301-24.639)   | 0.168   |
| Prior TAA                  | -4.692 (-15.912-1.824)     | 0.043   | -3.016 (-7.714-1.682)    | 0.208   |
| Prior aortic surgery       | -7.044 (-15.912-1.824)     | 0.119   | -0.140 (-9.407-9.126)    | 0.976   |
| Prior cardiac surgery      | -3.506 (-9.066-2.054)      | 0.216   | -2.938 (-8.719-2.844)    | 0.318   |
| BAV                        | 6.116 (-1.891-14.124)      | -1.134  | 3.630 (-4.732-11.992)    | 0.394   |
| AV surgery at ATAAD        | -0.845 (-3.199-1.509)      | -0.481  | 0.254 (-2.220-2.728)     | 0.840   |
| Aortic arch surgery        | -1.529 (-3.973-0.915)      | 0.219   | -2.379 (-4.909-0.151)    | 0.065   |
| ATAAD                      |                            |         |                          |         |
| DHCA                       | -0.577 (-2.868-1.713)      | 0.620   | -1.218 (-3.593-1.157)    | 0.314   |

\*Beta estimates were adjusted for age and sex in a multivariable linear regression model. Beta coefficients and corresponding 95% CI are shown. Interpretation for beta coefficients: if the beta coefficient is positive, for every unit increase in the predictor variable, the outcome variable (PCS or MCS score) will increase by the beta coefficient value.

COPD = chronic obstructive pulmonary disease; CVA = cerebrovascular accident; MI = myocardial infarction; TAA = thoracic aortic aneurysm; BAV = bicuspid aortic valve; AV = aortic valve; DHCA = deep hypothermic circulatory arrest.
